# Supplementary material for: Increase in transmitted resistance to non-nucleoside reverse transcriptase inhibitors among newly diagnosed HIV-1 infections in Europe
Source: Springer Nature journal article supplement (doi:10.1186/1471-2334-14-407), 2014-07-21

**A****Prevalence of TDRM over time**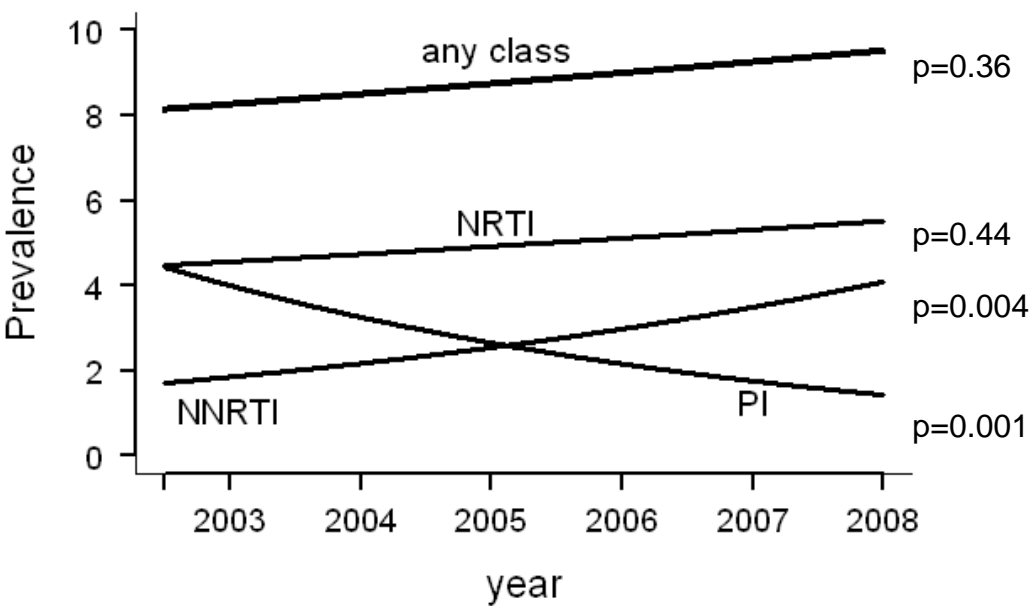**B****Prevalence of resistance over time**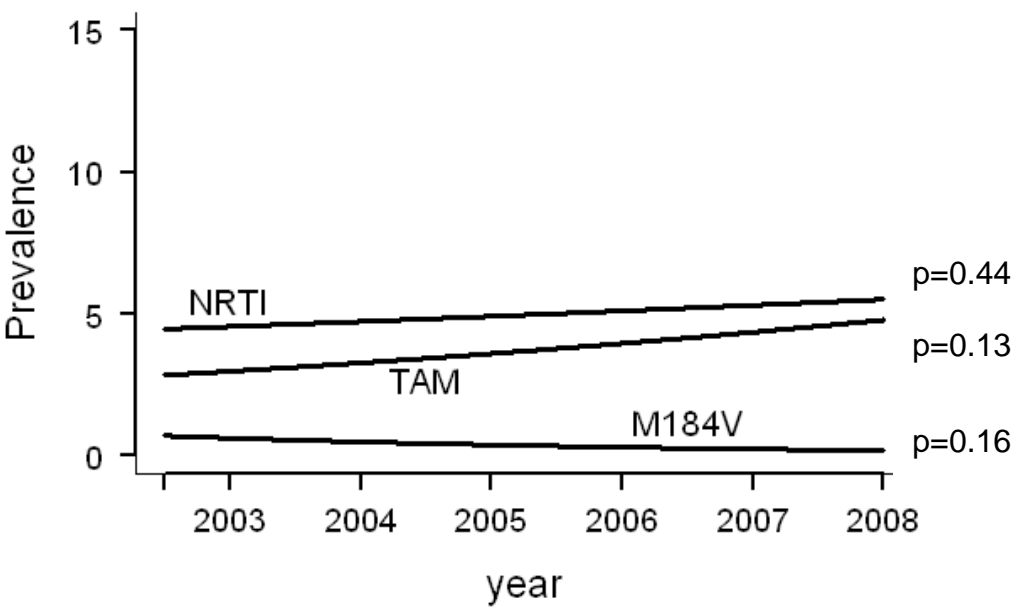

Supplement: 12879_2013_3712_MOESM2_ESM.pdf [file 12879_2013_3712_MOESM2_ESM.pdf]
